# Supplementary material
Source: PubMed Central journal article supplement (PMC5771496)
Supplement: NIHMS841878-supplement-1.pdf [file NIHMS841878-supplement-1.pdf]

**Figure S1. Surprise question collection instrument**

## SQ Query Form

Would you be surprised if this patient died in the next 12 months?

No

Yes

How surprised would you be if this patient died in the next 12 months?

1

2

3

4

5

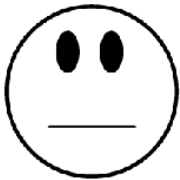

Not Surprised

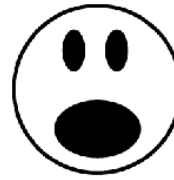

Very Surprised
