# Supplementary material
Source: PubMed Central journal article supplement (PMC5771496)
Supplement: NIHMS841878-supplement-2.pdf [file NIHMS841878-supplement-2.pdf]

**Table S1.** Variables of interest

| Variable                                           | Comment                                                       |
|----------------------------------------------------|---------------------------------------------------------------|
| Age                                                |                                                               |
| Gender                                             |                                                               |
| Race/ethnicity                                     | Self-reported                                                 |
| Marital status                                     |                                                               |
| Insurance status                                   |                                                               |
| Zip code                                           |                                                               |
| Place of residence                                 | Community, assisted living, nursing home                      |
| CKD etiology                                       | Multiple etiologies allowed                                   |
| Diabetes                                           | subcategorized by evidence of microvascular complications     |
| Hypertension                                       |                                                               |
| Dyslipidemia                                       |                                                               |
| Tobacco use                                        |                                                               |
| Coronary artery disease                            |                                                               |
| Cerebrovascular disease                            | subcategorized by residual deficit and presence of hemiplegia |
| PVD                                                |                                                               |
| Heart failure                                      | subcategorized by LVEF if available                           |
| Valvular disease (moderate or severe)              | subcategorized by valves involved and severity                |
| Arrhythmias                                        | subcategorized by type                                        |
| Chronic lung disease                               |                                                               |
| Chronic liver disease                              | subcategorized by presence of cirrhosis                       |
| AIDS                                               |                                                               |
| Connective tissue disorder                         |                                                               |
| Chronic debilitating neurologic disorders          |                                                               |
| Malignancy within 5 years                          | subcategorized by type and metastatic status                  |
| Dementia                                           |                                                               |
| Mood disorders                                     | subcategorized by active treatment                            |
| Peptic ulcer disease/GI bleed                      |                                                               |
| Gout                                               |                                                               |
| Inflammatory bowel disease                         |                                                               |
| Solid organ transplant                             | subcategorized by type                                        |
| Non-elective hospitalization within the prior 12mo |                                                               |
| ER visits within past 12 months                    |                                                               |
| Blood pressure                                     |                                                               |
| BMI                                                |                                                               |
| Albumin                                            |                                                               |
| Creatinine/eGFR                                    |                                                               |
| Hemoglobin                                         |                                                               |
