# Supplementary material
Source: PubMed Central journal article supplement (PMC5771496)
Supplement: NIHMS841878-supplement-3.pdf [file NIHMS841878-supplement-3.pdf]

**Table S2.** Frequencies of trinary and binary SQ responses

|                              | <b>Not surprised</b><br><b>(Score of 1 or 2 on Likert scale)</b> | <b>Neutral</b><br><b>(Score of 3 on Likert scale)</b> | <b>Surprised</b><br><b>(Score of 4 or 5 on Likert scale)</b> |
|------------------------------|------------------------------------------------------------------|-------------------------------------------------------|--------------------------------------------------------------|
| <b>Yes</b><br>(Surprised)    | 0                                                                | 49                                                    | 202                                                          |
| <b>No</b><br>(Not Surprised) | 106                                                              | 31                                                    | 0                                                            |
