# Supplementary material
Source: PubMed Central journal article supplement (PMC5771496)
Supplement: NIHMS841878-supplement-4.pdf [file NIHMS841878-supplement-4.pdf]

**Table S3.** Baseline characteristics stratified by binary surprise question response

|                                                               | <b>Total Cohort</b><br>(N=388) | <b>SQ 'No'</b><br>(N=137) | <b>SQ 'Yes'</b><br>(N=251) | <b>P value</b>   |
|---------------------------------------------------------------|--------------------------------|---------------------------|----------------------------|------------------|
| Age (median, IQR)                                             | 71(65-77)                      | 74.0 (68-80)              | 69.0(65-75)                | <b>&lt;0.001</b> |
| Female                                                        | 195(50)                        | 68(50)                    | 127(51)                    | 0.9              |
| <b>Race</b>                                                   |                                |                           |                            | 0.3              |
| White                                                         | 321(83)                        | 112(82)                   | 209(84)                    |                  |
| Black                                                         | 58(15)                         | 22(16)                    | 36(14)                     |                  |
| <b>Marital Status</b>                                         |                                |                           |                            | 0.08             |
| Married                                                       | 238(62)                        | 83(61)                    | 155(62)                    |                  |
| Divorced / Separated                                          | 42(11)                         | 8(6)                      | 34(14)                     |                  |
| Widow/Widower                                                 | 89(23)                         | 38(28)                    | 51(20)                     |                  |
| Single                                                        | 14(4)                          | 6(4)                      | 8(3)                       |                  |
| <b>Insurance</b>                                              |                                |                           |                            | 0.2              |
| Medicare/Medicare Advantage                                   | 312 (80)                       | 118 (86)                  | 194 (77)                   |                  |
| Private                                                       | 72 (19)                        | 18 (13)                   | 54 (22)                    |                  |
| Medicaid/Medical Assistance                                   | 3 (1)                          | 1 (1)                     | 2 (1)                      |                  |
| <b>Charlson Comorbidity Index</b>                             | 5 (4-6)                        | 6 (5-8)                   | 5 (3-6)                    | <b>&lt;0.001</b> |
| <b>Time since 1<sup>st</sup> visit with provider (months)</b> | 30.1 (13.0-71.7)               | 17.6 (6.2-53.4)           | 30.6 (9.8-82.9)            | <b>0.003</b>     |
| <b>Comorbidities</b>                                          |                                |                           |                            |                  |
| Hypertension                                                  | 381 (98)                       | 134 (98)                  | 247 (98)                   | 0.7              |
| Diabetes with microvascular                                   | 196 (51)                       | 79 (58)                   | 117 (47)                   | 0.1              |
| Dyslipidemia                                                  | 312 (80)                       | 105 (77)                  | 207 (82)                   | 0.2              |
| Coronary artery disease                                       | 151 (39)                       | 65 (47)                   | 86 (34)                    | <b>0.01</b>      |
| Congestive heart failure                                      | 119 (31)                       | 58 (42)                   | 61(24)                     | <b>&lt;0.001</b> |
| Arrhythmia                                                    | 97 (25)                        | 48 (35)                   | 49 (20)                    | <b>&lt;0.001</b> |
| Cerebrovascular disease                                       | 88 (23)                        | 39 (28)                   | 49 (20)                    | <b>0.04</b>      |
| Peripheral vascular disease                                   | 78 (20)                        | 30 (22)                   | 48 (19)                    | 0.5              |
| Chronic lung disease                                          | 87 (22)                        | 38 (28)                   | 49 (20)                    | 0.06             |
| End-Stage Liver Disease/Cirrhosis                             | 17 (4)                         | 9 (7)                     | 8 (3)                      | 0.2              |
| Dementia                                                      | 23 (6)                         | 16 (12)                   | 7 (3)                      | <b>&lt;0.001</b> |
| Active Cancer (excludes non-melanomatous skin cancer)         | 67 (17)                        | 29 (21)                   | 38 (15)                    | 0.1              |
| <b>Causes of chronic kidney disease</b>                       |                                |                           |                            | <b>0.001</b>     |
| Diabetes                                                      | 183 (47)                       | 74 (54)                   | 109 (43)                   |                  |
| Hypertension                                                  | 278 (72)                       | 103 (75)                  | 175 (70)                   |                  |
| NSAID nephropathy                                             | 31 (8)                         | 8 (6)                     | 23 (9)                     |                  |
| Cardiorenal                                                   | 30 (8)                         | 20 (15)                   | 10 (4)                     |                  |
| Ischemic renal dsz/RAS                                        | 30 (8)                         | 13 (9)                    | 17 (7)                     |                  |
| Previous AKI                                                  | 59 (15)                        | 27 (20)                   | 32 (13)                    |                  |
| Primary glomerular disease                                    | 32 (8)                         | 7 (5)                     | 25 (10)                    |                  |
| ADPKD                                                         | 9 (2)                          | 0 (0)                     | 9 (4)                      |                  |
| <b>Laboratory tests</b>                                       |                                |                           |                            |                  |
| eGFR (CKD-EPI equation)                                       | 21.3 (15.4-26.5)               | 19.5 (14.1-23.7)          | 22.8 (16.9-27.4)           | <b>&lt;0.001</b> |
| serum creatinine                                              | 2.5 (2.1-3.3)                  | 2.8 (2.3-3.8)             | 2.5 (2.1-3.1)              | <b>0.002</b>     |
| serum albumin*                                                | 4.0 (3.7-4.2)                  | 3.8 (3.6-4.1)             | 4.1 (3.8-4.2)              | <b>&lt;0.001</b> |
| hemoglobin                                                    | 11.4 (10.3-12.6)               | 10.8 (9.8-12.2)           | 11.7(10.8-12.9)            | <b>&lt;0.001</b> |

Continuous variables are presented as median (interquartile range) and categorical variables as N (%).

SQ surprise question, microvascular microvascular complications, CKD chronic kidney disease, NSAID non-steroidal anti-inflammatory drug, dsz disease, RAS renal artery stenosis, AKI acute kidney injury, ADPKD autosomal dominant polycystic kidney disease, eGFR estimated glomerular filtration rate

\*N=365
