# Supplementary material
Source: PubMed Central journal article supplement (PMC5771496)
Supplement: NIHMS841878-supplement-5.pdf [file NIHMS841878-supplement-5.pdf]

**Table S4:** Increase in model fit gained from each respective variable in Cox proportional hazards model after adjusting for age, gender, and race.

| <b>Variable</b>            | <b>Gini mean difference of hazards (95% CI)</b> |
|----------------------------|-------------------------------------------------|
| Surprise Question trinary  | 0.94 (0.38, 2.20)                               |
| Charlson Comorbidity Index | 0.75 (0.30, 1.55)                               |
| Surprise Question binary   | 0.61 (0.20, 1.29)                               |
| Albumin                    | 0.57 (0.15, 1.28)                               |
| Heart failure              | 0.55 (0.16, 1.20)                               |
| Hemoglobin                 | 0.41 (0.05, 1.08)                               |
| Diabetes                   | 0.27 (0.02, 1.42)                               |
| Arrhythmia                 | 0.23 (0.01, 0.69)                               |
| Dementia                   | 0.15 (0.01, 0.46)                               |
